# Supplementary material for: Suppression of ferroptosis through the SLC7A11/glutathione/glutathione peroxidase 4 axis contributes to the therapeutic action of the Tangshenning formula on diabetic renal tubular injury
Source: PubMed Central journal article supplement (PMC11523893; doi:10.1186/s13020-024-01007-8), 2024-10-29
Supplement: 13020_2024_1007_MOESM2_ESM.pdf [file 13020_2024_1007_MOESM2_ESM.pdf]

Table S1: Chemical composition of TSN.

| NO. | Observed RT<br>(min) | Component name                   | Formula                                         | Neutral mass<br>(Da) | Mass error<br>(ppm) | ESI<br>mode |
|-----|----------------------|----------------------------------|-------------------------------------------------|----------------------|---------------------|-------------|
| 1   | 5.40                 | Gallic acid                      | C <sub>7</sub> H <sub>6</sub> O <sub>5</sub>    | 170.02152            | 3.8                 | positive    |
| 2   | 24.28                | Coumarin                         | C <sub>9</sub> H <sub>6</sub> O <sub>2</sub>    | 146.03678            | 4.4                 | positive    |
| 3   | 27.59                | Tetramethylpyrazine              | C <sub>8</sub> H <sub>12</sub> N <sub>2</sub>   | 136.10005            | 6.7                 | positive    |
| 4   | 29.35                | Calycosin-7- O -β-D-glucoside    | C <sub>22</sub> H <sub>22</sub> O <sub>10</sub> | 446.12130            | 1.1                 | positive    |
| 5   | 33.26                | 4-hydroxy-3-butylphthalide       | C <sub>12</sub> H <sub>14</sub> O <sub>3</sub>  | 206.09429            | 2.8                 | positive    |
| 6   | 36.44                | Senkyunolide                     | C <sub>12</sub> H <sub>16</sub> O <sub>2</sub>  | 192.11503            | 2.7                 | positive    |
| 7   | 37.61                | Ononin                           | C <sub>22</sub> H <sub>22</sub> O <sub>9</sub>  | 430.12638            | 1.2                 | positive    |
| 8   | 40.27                | Methylnissolin                   | C <sub>17</sub> H <sub>16</sub> O <sub>5</sub>  | 300.09977            | 3.2                 | positive    |
| 9   | 40.27                | 9-O-Methylnissolin 3-O-glucoside | C <sub>23</sub> H <sub>26</sub> O <sub>10</sub> | 462.15260            | 1.1                 | positive    |
| 10  | 42.08                | Calycosin                        | C <sub>16</sub> H <sub>12</sub> O <sub>5</sub>  | 284.06847            | 3.8                 | positive    |
| 11  | 42.19                | Isomucronulatol                  | C <sub>17</sub> H <sub>18</sub> O <sub>5</sub>  | 302.11542            | 2.5                 | positive    |

---

|    |       |                       |                                                 |            |      |          |
|----|-------|-----------------------|-------------------------------------------------|------------|------|----------|
| 12 | 42.48 | Quercetin             | C <sub>15</sub> H <sub>10</sub> O <sub>7</sub>  | 302.04265  | 3.7  | positive |
| 13 | 52.42 | Isoastragaloside IV   | C <sub>41</sub> H <sub>68</sub> O <sub>14</sub> | 784.46091  | 0.2  | positive |
| 14 | 54.56 | Astragaloside VI      | C <sub>47</sub> H <sub>78</sub> O <sub>19</sub> | 946.51373  | 1.1  | positive |
| 15 | 56.75 | Astragaloside III     | C <sub>41</sub> H <sub>68</sub> O <sub>14</sub> | 784.46091  | 0.6  | positive |
| 16 | 57.24 | Astragaloside IV      | C <sub>41</sub> H <sub>68</sub> O <sub>14</sub> | 784.46091  | 1.1  | positive |
| 17 | 60.77 | Astramembrannin II    | C <sub>35</sub> H <sub>58</sub> O <sub>9</sub>  | 622.40808  | -0.3 | positive |
| 18 | 60.82 | Agroastragaloside III | C <sub>51</sub> H <sub>82</sub> O <sub>21</sub> | 1030.53486 | 2.1  | positive |
| 19 | 61.18 | Astragaloside II      | C <sub>43</sub> H <sub>70</sub> O <sub>15</sub> | 826.47147  | 0.4  | positive |
| 20 | 62.83 | Astragaloside VIII    | C <sub>47</sub> H <sub>76</sub> O <sub>17</sub> | 912.50825  | 1.7  | positive |
| 21 | 68.29 | Sedanolide            | C <sub>12</sub> H <sub>18</sub> O <sub>2</sub>  | 194.13068  | 3    | positive |
| 22 | 68.32 | Linolenic acid        | C <sub>18</sub> H <sub>30</sub> O <sub>2</sub>  | 278.22458  | 1.3  | positive |
| 23 | 68.86 | ligustilide           | C <sub>12</sub> H <sub>14</sub> O <sub>2</sub>  | 190.09938  | 3.4  | positive |
| 24 | 70.45 | Isoastragaloside I    | C <sub>45</sub> H <sub>72</sub> O <sub>16</sub> | 868.48204  | 1    | positive |

---

---

|    |       |                               |                                                               |           |       |          |
|----|-------|-------------------------------|---------------------------------------------------------------|-----------|-------|----------|
| 25 | 79.24 | Physcion                      | C <sub>16</sub> H <sub>12</sub> O <sub>5</sub>                | 284.06847 | 3.4   | positive |
| 26 | 8.19  | Protocatechuic acid           | C <sub>7</sub> H <sub>6</sub> O <sub>4</sub>                  | 154.02661 | -7.6  | negative |
| 27 | 16.80 | Sanguiin H-4                  | C <sub>27</sub> H <sub>22</sub> O <sub>18</sub>               | 634.08061 | 2.4   | negative |
| 28 | 16.80 | d-catechin                    | C <sub>15</sub> H <sub>14</sub> O <sub>6</sub>                | 290.07904 | -2.4  | negative |
| 29 | 17.39 | caffeic acid                  | C <sub>9</sub> H <sub>8</sub> O <sub>4</sub>                  | 180.04226 | -7.7  | negative |
| 30 | 18.75 | (-)-epicatechin               | C <sub>15</sub> H <sub>14</sub> O <sub>6</sub>                | 290.07904 | -5.6  | negative |
| 31 | 23.45 | Riboflavin                    | C <sub>17</sub> H <sub>20</sub> N <sub>4</sub> O <sub>6</sub> | 376.13828 | -4.5  | negative |
| 32 | 25.17 | Ferulic acid                  | C <sub>10</sub> H <sub>10</sub> O <sub>4</sub>                | 194.05791 | -11.1 | negative |
| 33 | 31.39 | Isoquercitrin                 | C <sub>21</sub> H <sub>20</sub> O <sub>12</sub>               | 464.09548 | 1.2   | negative |
| 34 | 35.55 | Isorhamnetin-3-glucoside      | C <sub>22</sub> H <sub>22</sub> O <sub>12</sub>               | 478.11113 | 2.8   | negative |
| 35 | 41.68 | Kaempferide-3-glucoside       | C <sub>22</sub> H <sub>22</sub> O <sub>11</sub>               | 462.11621 | -1    | negative |
| 36 | 42.20 | isomucronulatol 7-O-glucoside | C <sub>23</sub> H <sub>28</sub> O <sub>10</sub>               | 464.16825 | -1    | negative |
| 37 | 43.97 | Chrysophanol                  | C <sub>15</sub> H <sub>10</sub> O <sub>4</sub>                | 254.05791 | -4.2  | negative |

---

---

|    |       |                                                   |                                                 |           |      |          |
|----|-------|---------------------------------------------------|-------------------------------------------------|-----------|------|----------|
| 38 | 48.63 | Kaempferol                                        | C <sub>15</sub> H <sub>10</sub> O <sub>6</sub>  | 286.04774 | -3.3 | negative |
| 39 | 49.12 | 3'-methoxy-5'-hydroxyisoflavone-7-O-β-D-glucoside | C <sub>22</sub> H <sub>22</sub> O <sub>10</sub> | 446.1213  | -3.7 | negative |
| 40 | 50.40 | Astragaloside V                                   | C <sub>47</sub> H <sub>78</sub> O <sub>19</sub> | 946.51373 | 5.3  | negative |
| 41 | 54.50 | Aloeemodin                                        | C <sub>15</sub> H <sub>10</sub> O <sub>5</sub>  | 270.05282 | -7.1 | negative |
| 42 | 57.44 | Rhein                                             | C <sub>15</sub> H <sub>8</sub> O <sub>6</sub>   | 284.03209 | -3.7 | negative |
| 43 | 62.98 | Agroastragaloside IV                              | C <sub>49</sub> H <sub>80</sub> O <sub>20</sub> | 988.52429 | 5.1  | negative |
| 44 | 67.18 | Acetylastragaloside I                             | C <sub>47</sub> H <sub>74</sub> O <sub>17</sub> | 910.49260 | 4.7  | negative |
| 45 | 68.98 | Tormentic acid                                    | C <sub>30</sub> H <sub>48</sub> O <sub>5</sub>  | 488.35017 | -1.9 | negative |
| 46 | 69.52 | Emodin                                            | C <sub>15</sub> H <sub>10</sub> O <sub>5</sub>  | 270.05282 | -4   | negative |
| 47 | 72.60 | Astragaloside I                                   | C <sub>45</sub> H <sub>72</sub> O <sub>16</sub> | 868.48204 | 4.6  | negative |
| 48 | 78.94 | Corosolic acid                                    | C <sub>30</sub> H <sub>48</sub> O <sub>4</sub>  | 472.35526 | -1.9 | negative |
| 49 | 87.24 | Linolenic acid                                    | C <sub>18</sub> H <sub>30</sub> O <sub>2</sub>  | 278.22458 | -5.4 | negative |
| 50 | 89.79 | Mongholicoside I                                  | C <sub>36</sub> H <sub>60</sub> O <sub>9</sub>  | 636.42373 | 2.1  | negative |

---

---

|    |     |              |                   |           |      |          |
|----|-----|--------------|-------------------|-----------|------|----------|
| 51 | 100 | Ursolic acid | $C_{30}H_{48}O_3$ | 456.36035 | -0.8 | negative |
|----|-----|--------------|-------------------|-----------|------|----------|

---
